# Supplementary material
Source: Research Square preprint supplement (doi:10.21203/rs.3.rs-10118411/v1)

## Supplementary Figure and Figure legend

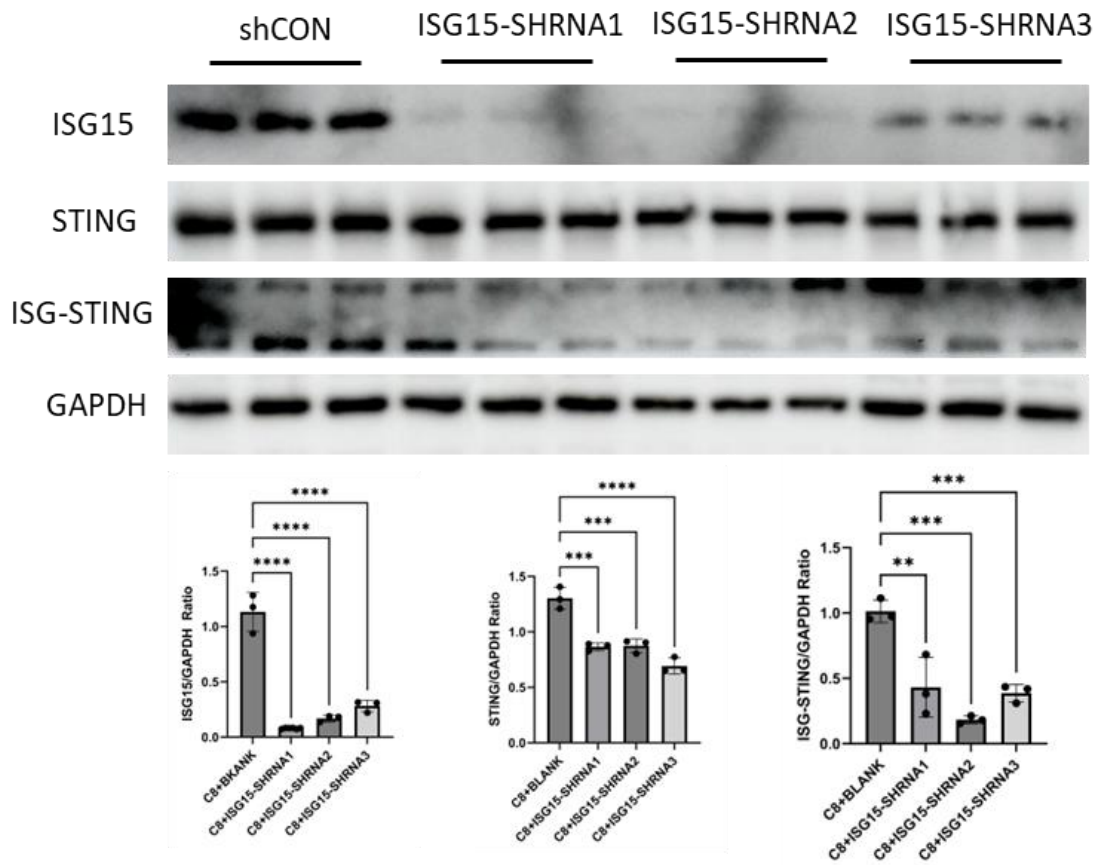

**Supplementary Fig. 1** shISG15 knockdown ISG and ISGylation of STING in C8-CIA. C8-CIA were infected with PLV-ShCon and three sets of shISG15 a-c for 3 days and then processed to WB with indicated antibodies and quantified with ImageJ. n=4.

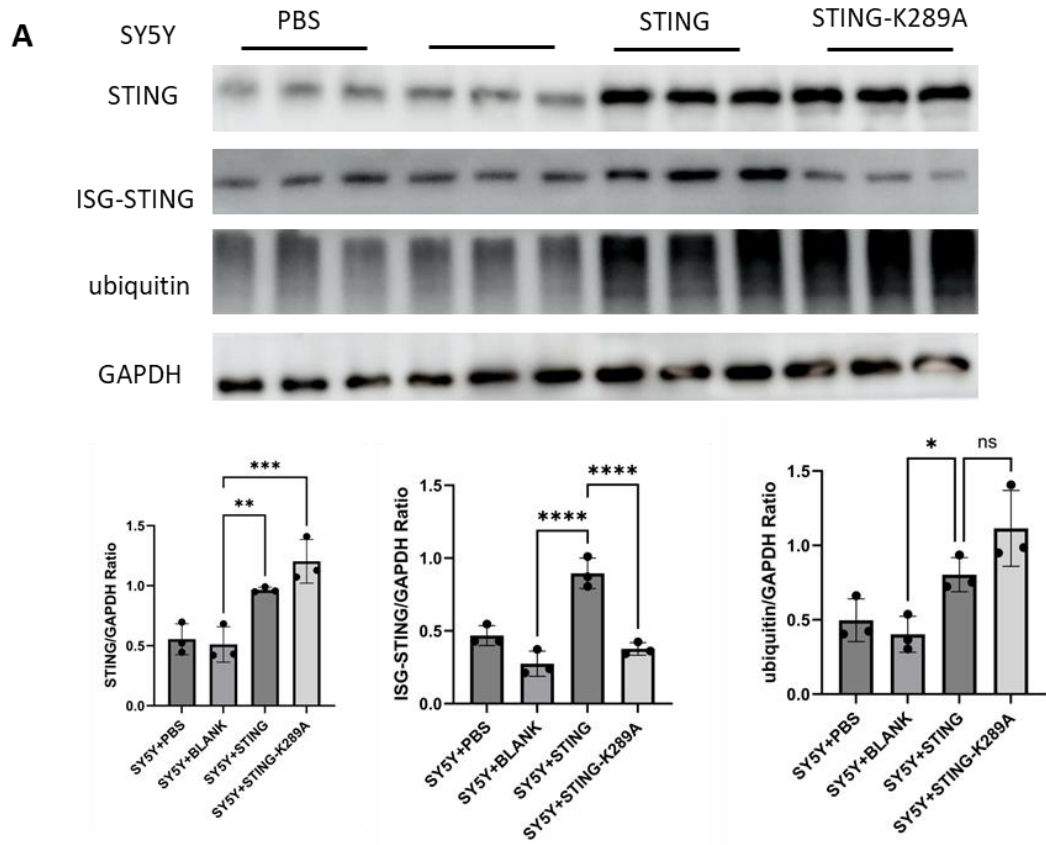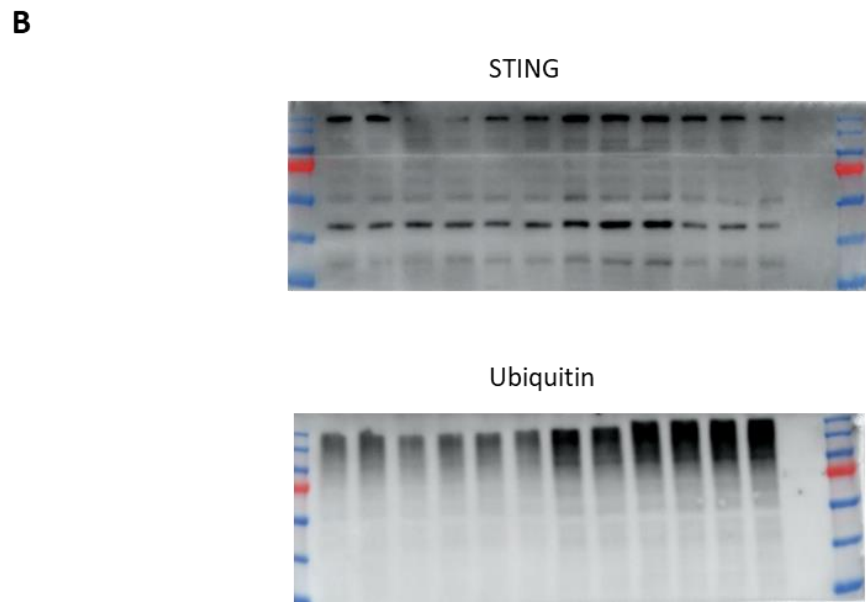

**Supplementary Fig. 2** STING-K289A blocked ISGylation of STING but was not associated with ubiquitination. (A) SH-SY5Y cells were infected with PLV-CON, PLV-STING-WT, and PLV-STING-K289A for 2 days and processed for WB with the indicated antibodies, and quantified with ImageJ. n=4. (B) Full blot of WB for STING and ubiquitination.

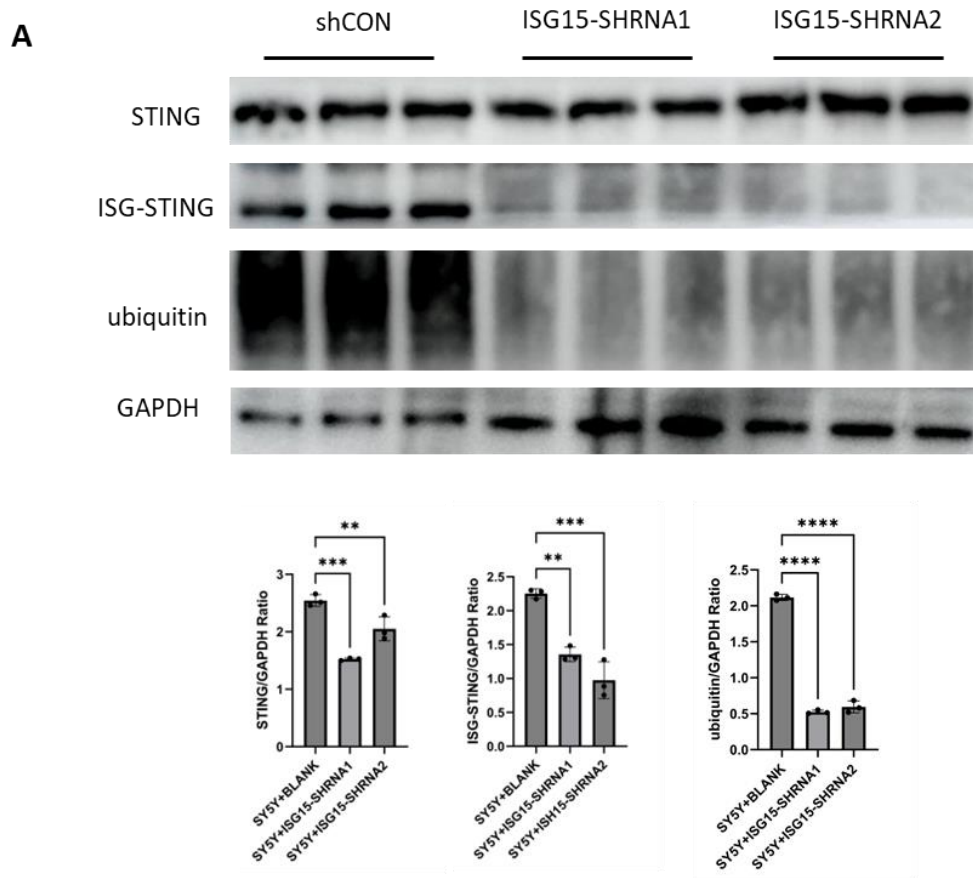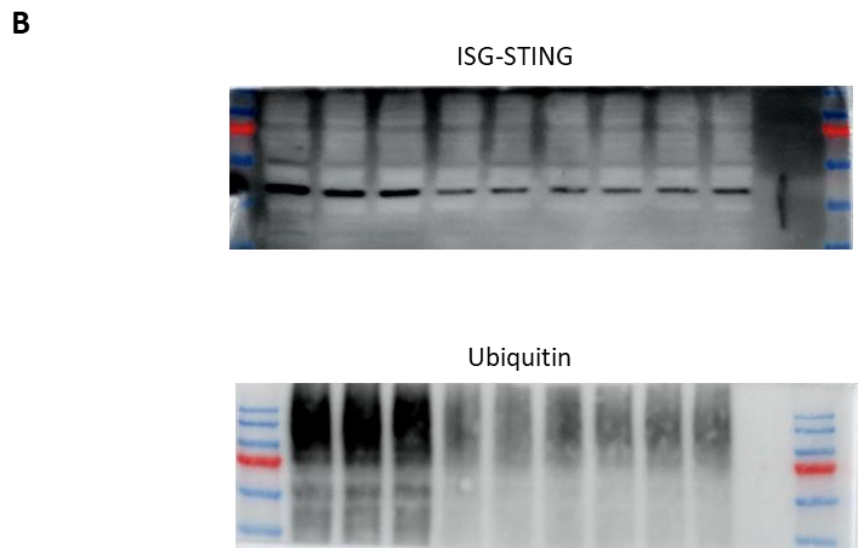

**Supplementary Fig. 3** shISG15 blocked ISGylation of STING but was not associated with ubiquitination. (A) SH-SY5Y cells were infected with PLV-shCon and PLV-shISG15 for 3 days and processed for WB with the indicated antibodies, and quantified with ImageJ. n=4. (B) Full blot of WB for STING and ubiquitination.

# Supplemental Figure 4 Uncropped Western blot

**Fig. 1A**

ISG15

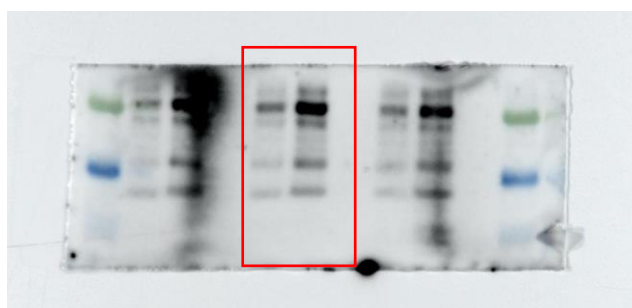

STING

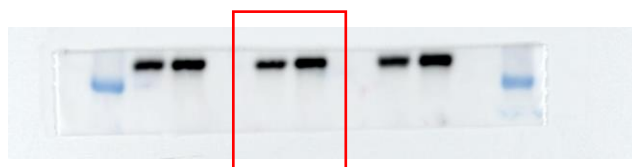

ISG15-ISG-STING

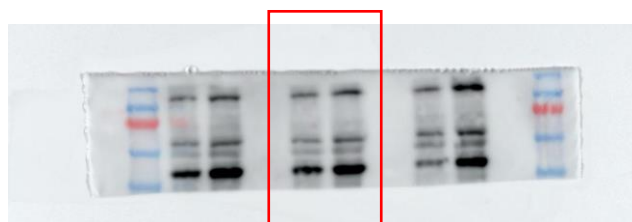

STING-ISG-STING

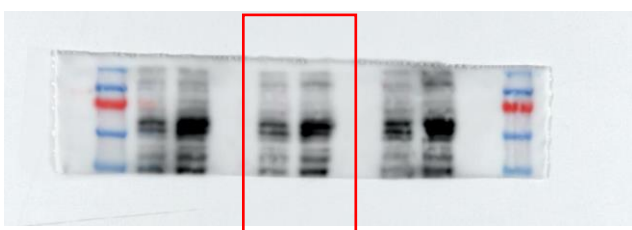

TH

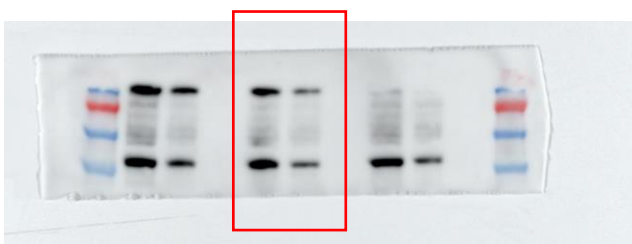

$\alpha$ -tublin

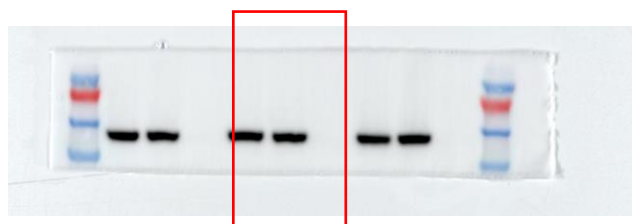

**Fig. 1B**

ISG15

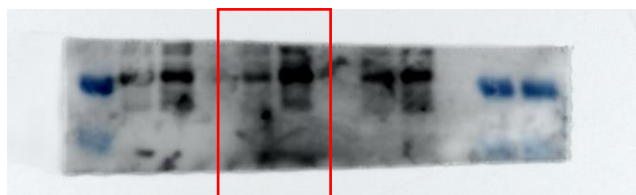

STING

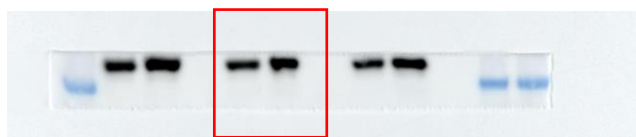

ISG15-ISG-STING

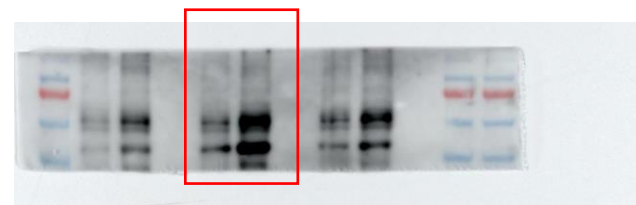

STING-ISG-STING

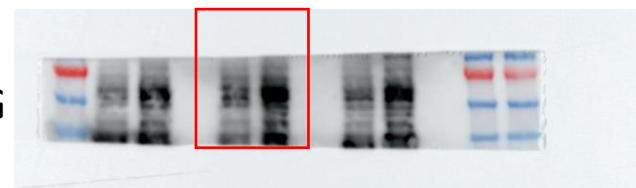

$\alpha$ -syn

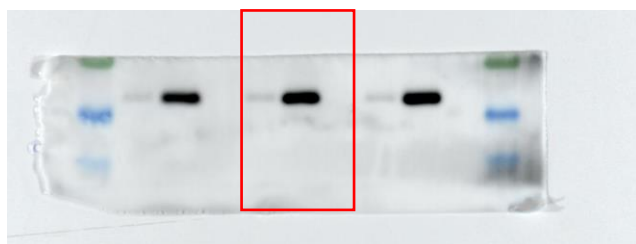

$\alpha$ -tubulin

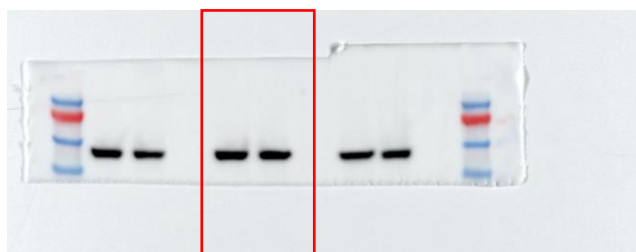

**Fig. 1C**

ISG15

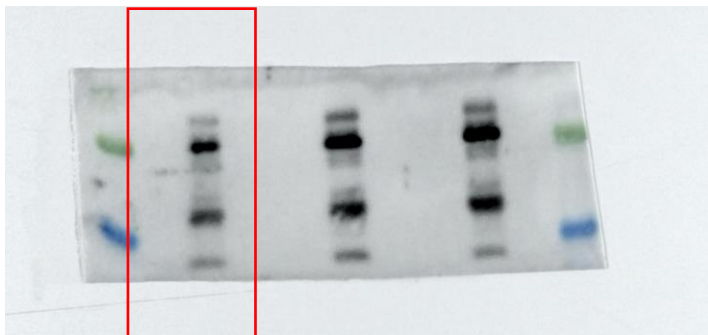

ISG-STING

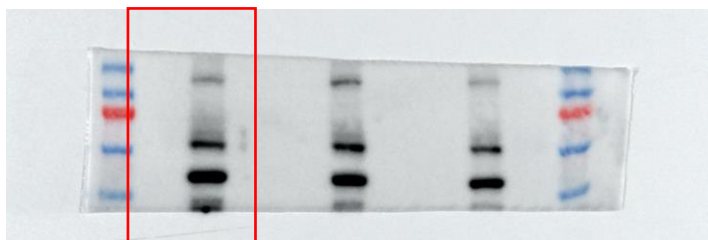

ISG15

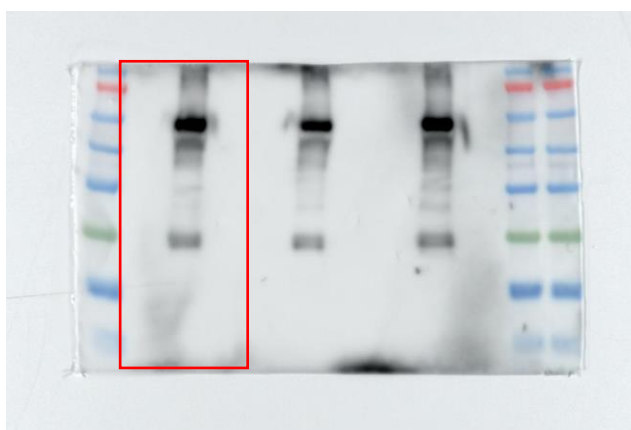

STING

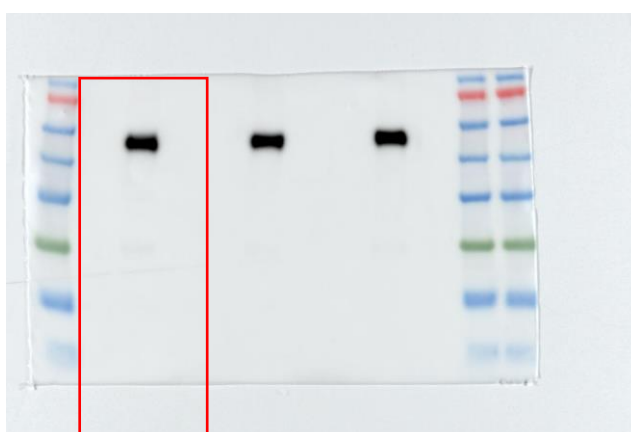

**Fig. 1C**

ISG15

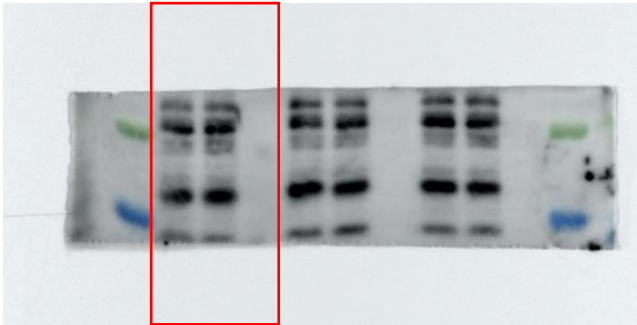

STING

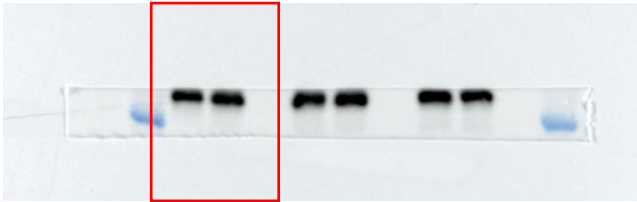

ISG-STING

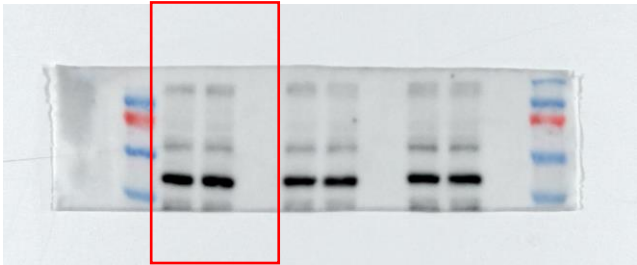

**Fig. 1D**

STING

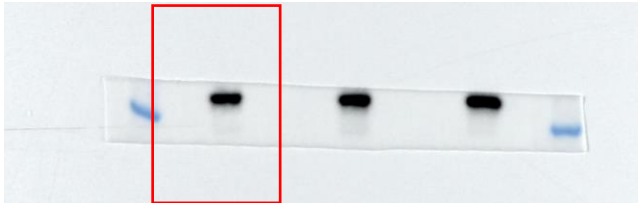

ISG-STING

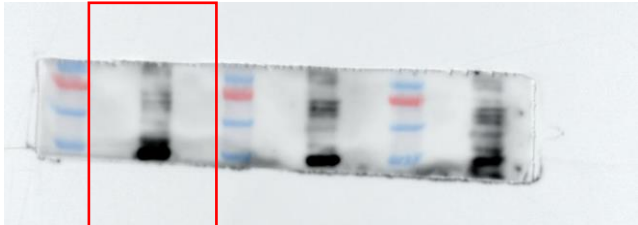

ISG15

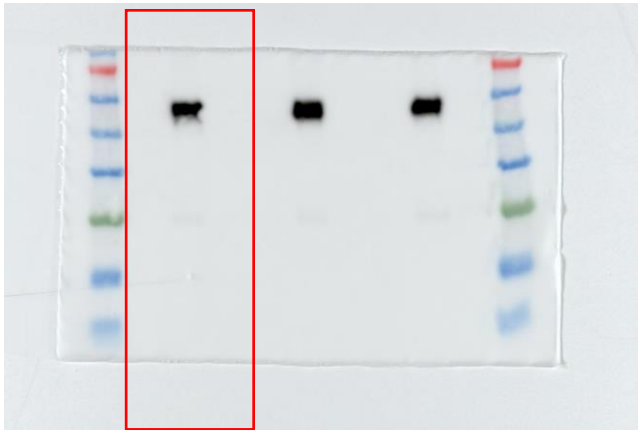

STING

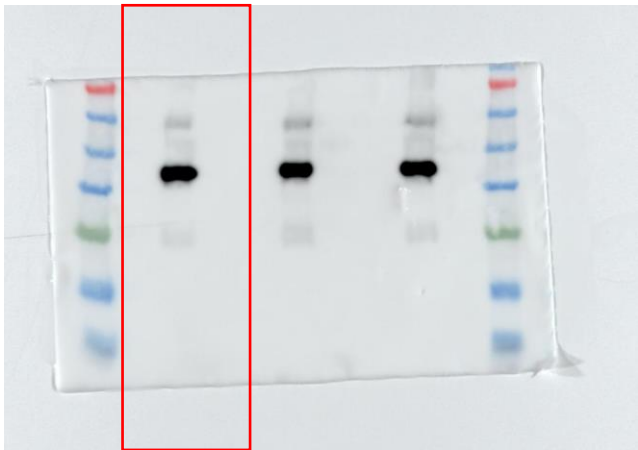

**Fig. 1D**

ISG15

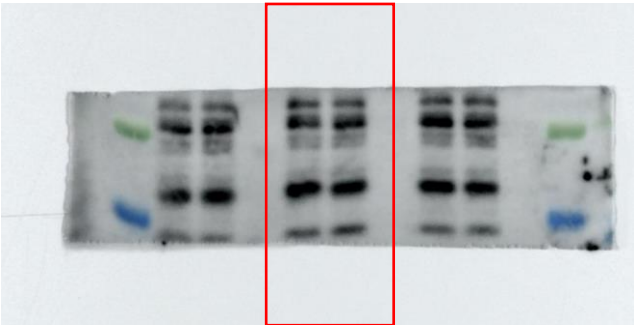

STING

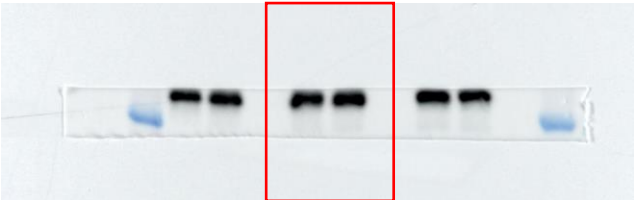

ISG-STING

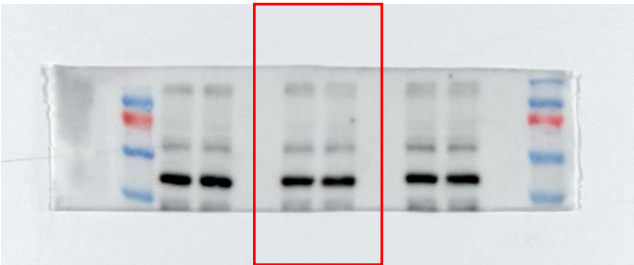

**Fig. 2C**

ISG15

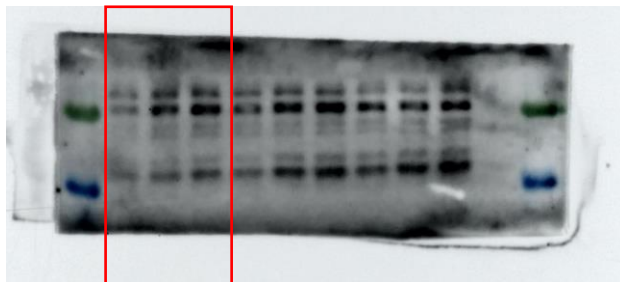

STING

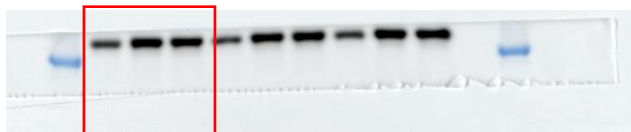

ISG-STING

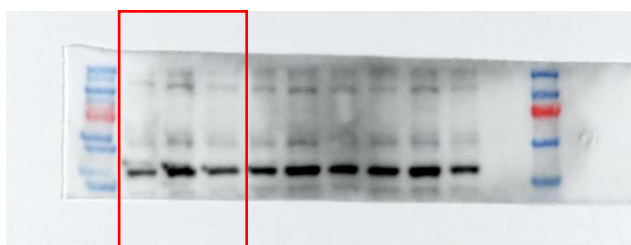

C-FOS

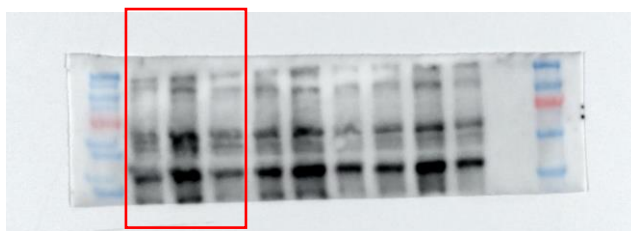

GAPDH

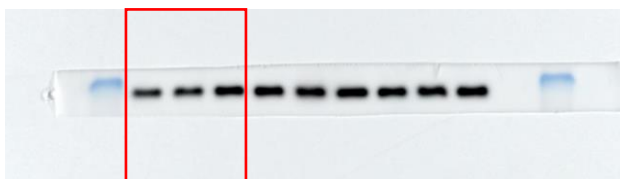

**Fig. 2D**

ISG15

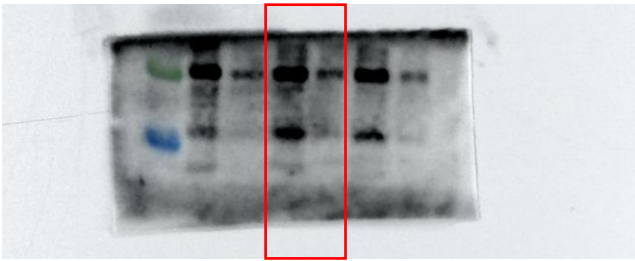

STING

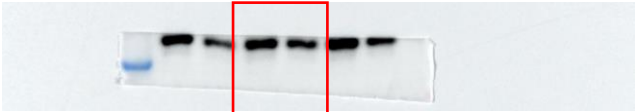

ISG-STING

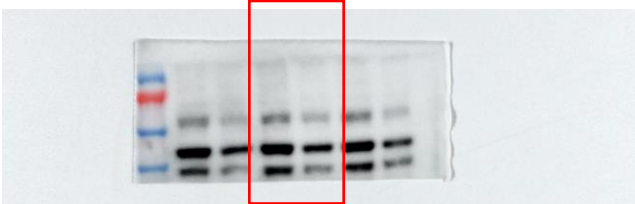

C-FOS

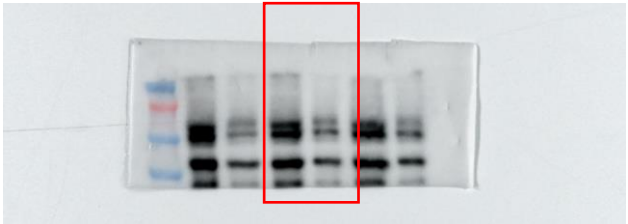

GAPDH

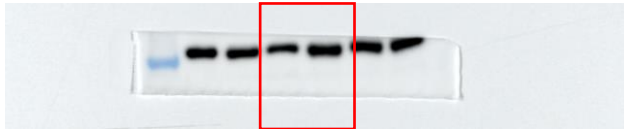

**Fig. 2E**

ISG15

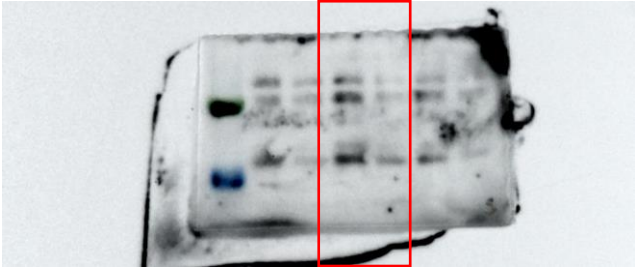

STING

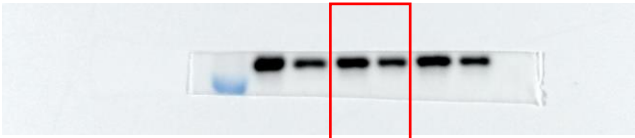

ISG-STING

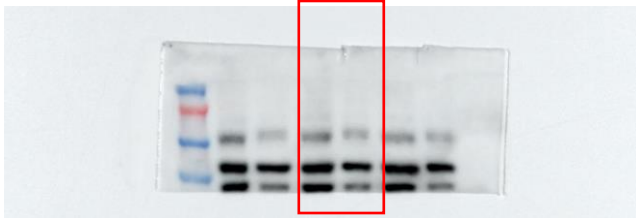

C-FOS

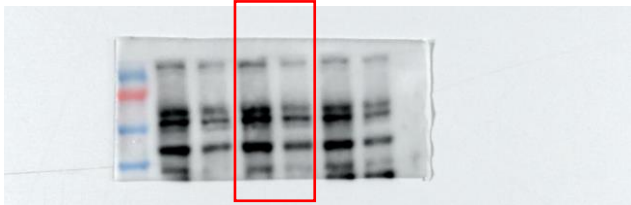

GAPDH

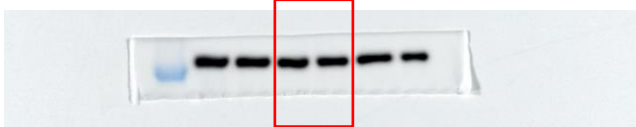

**Fig. 3A**

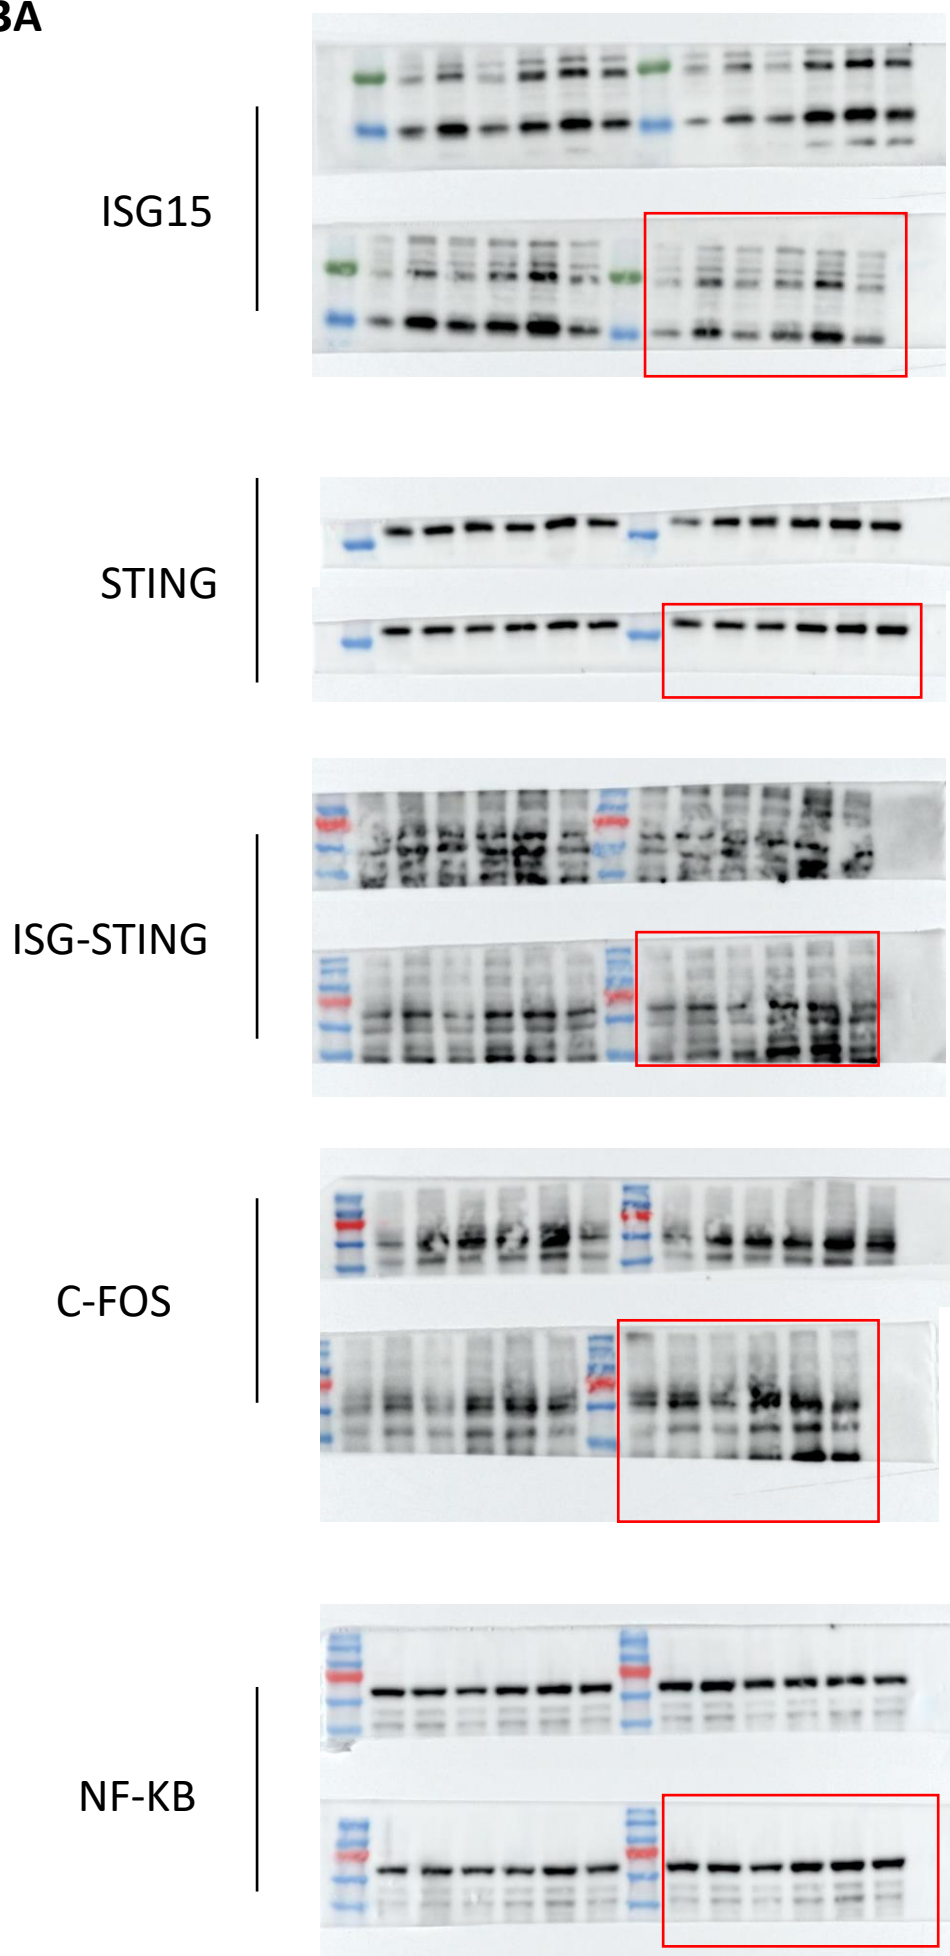

Fig. 3A

TNF- $\alpha$

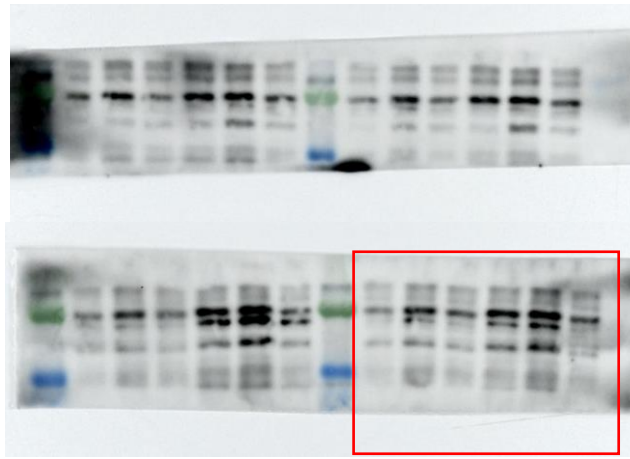

TH

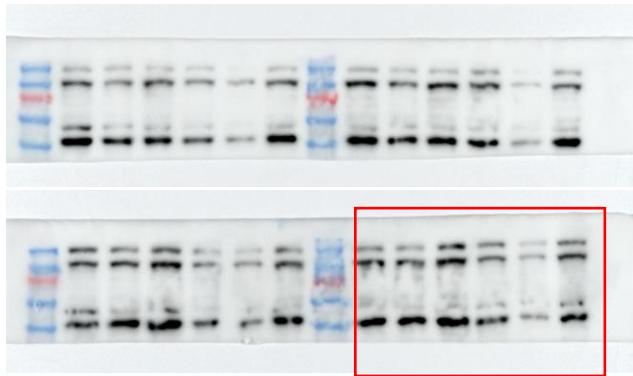

$\alpha$ -tubulin

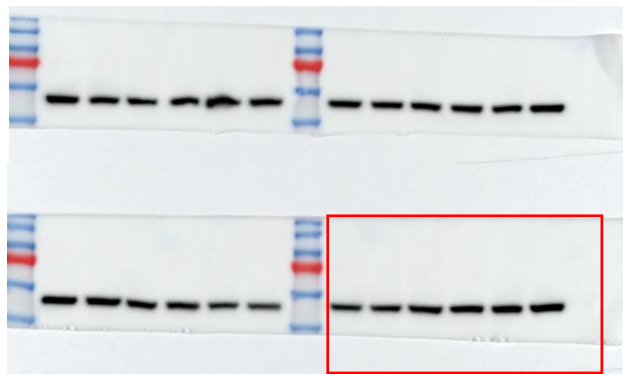

**Fig. 3C**

ISG15

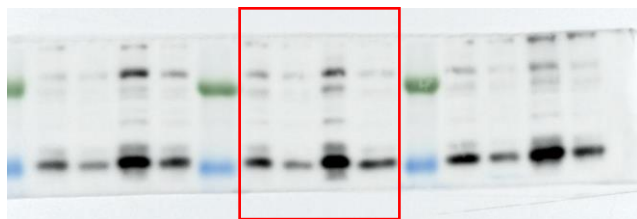

STING

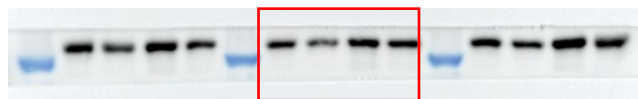

ISG-STING

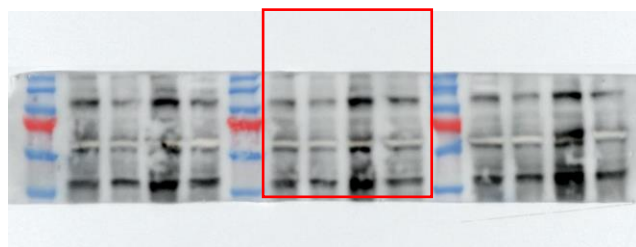

C-FOS

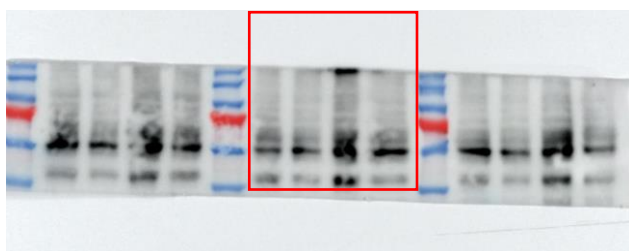

NF-KB

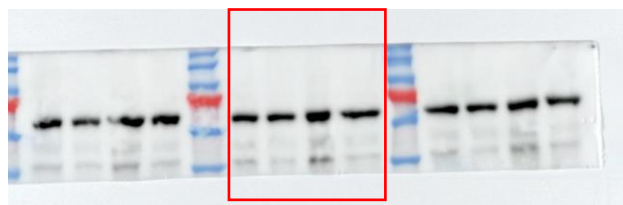

TNF- $\alpha$

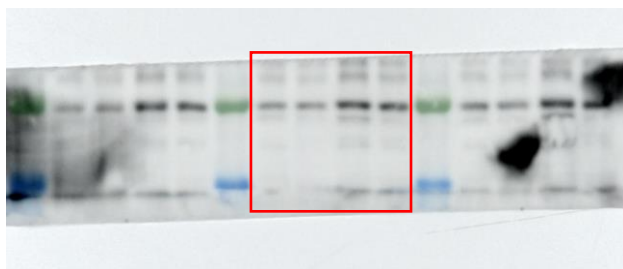

TH

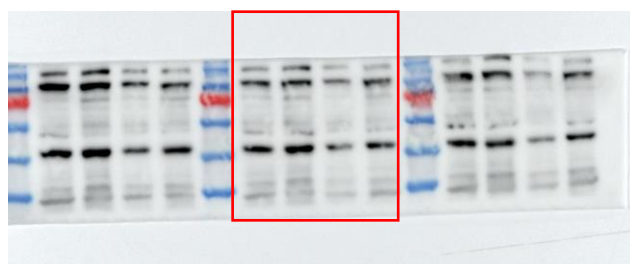

$\alpha$ -tubulin

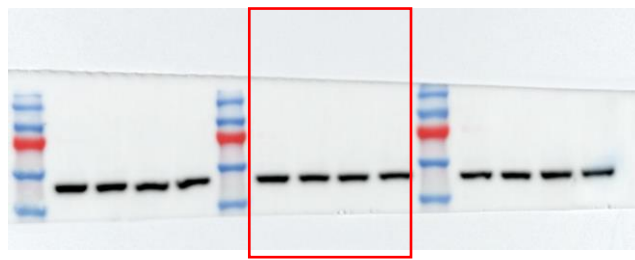

**Fig. 3E**

ISG15

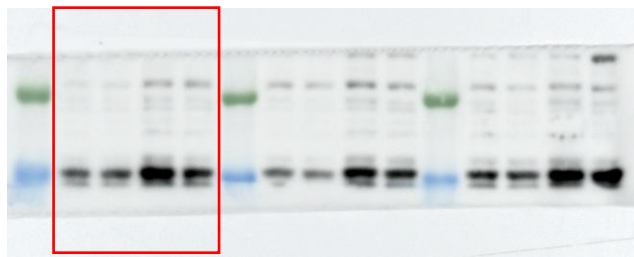

STING

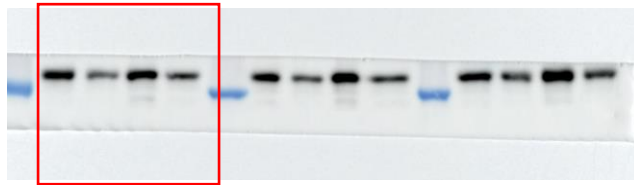

ISG-STING

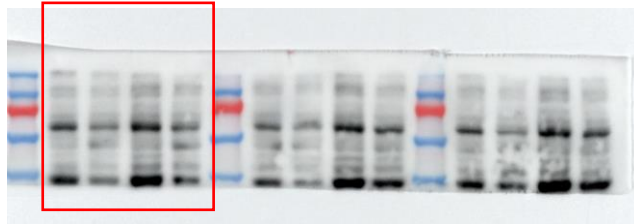

C-FOS

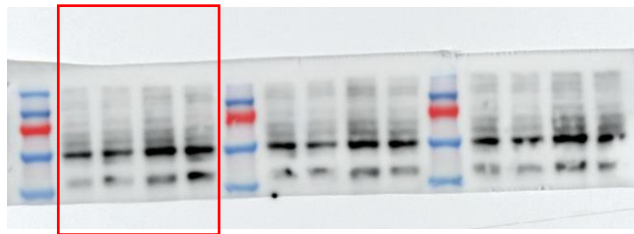

NF-KB

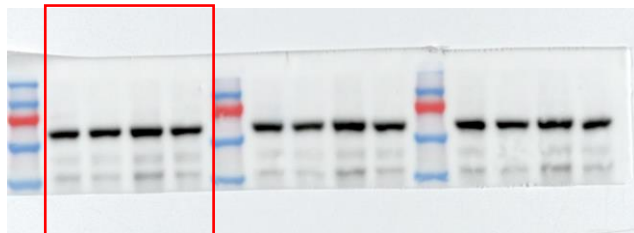

TNF- $\alpha$

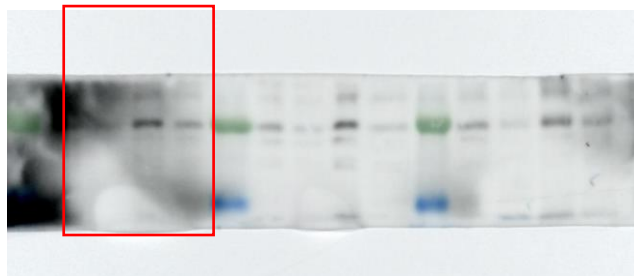

TH

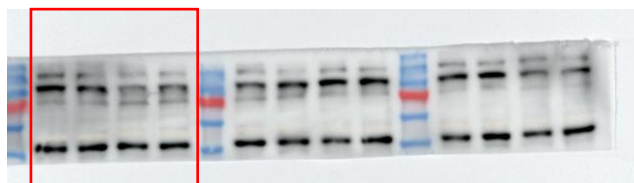

$\alpha$ -tublin

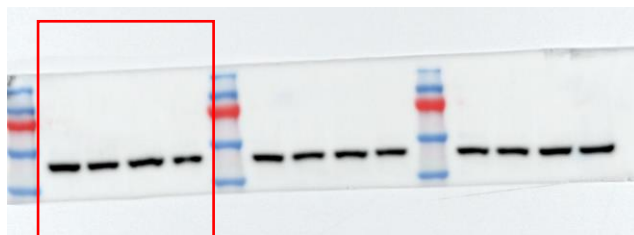

**Fig. 3F**

STING

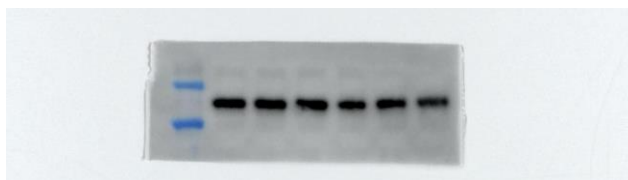

ISG-STING

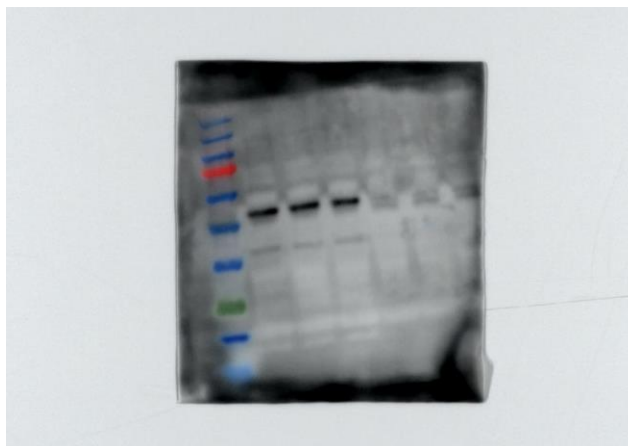

ubiquitin

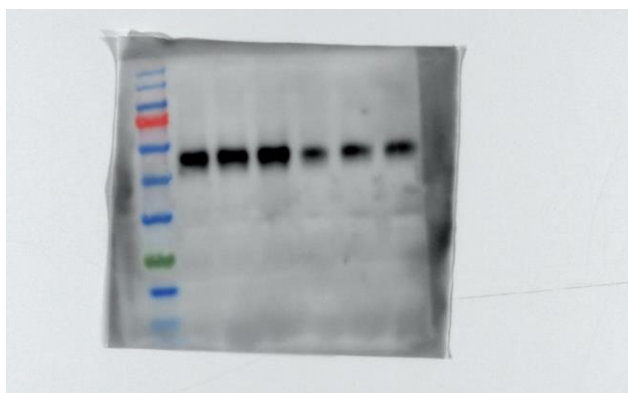

GAPDH

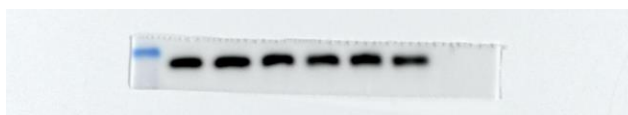

**Fig. 3F**

STING

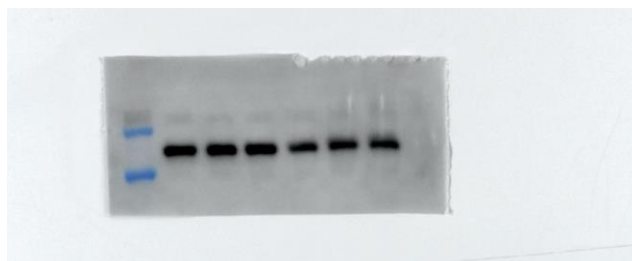

ISG-STING

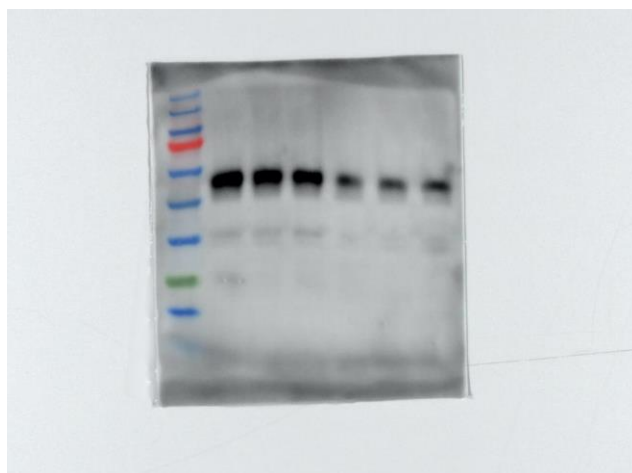

ubiquitin

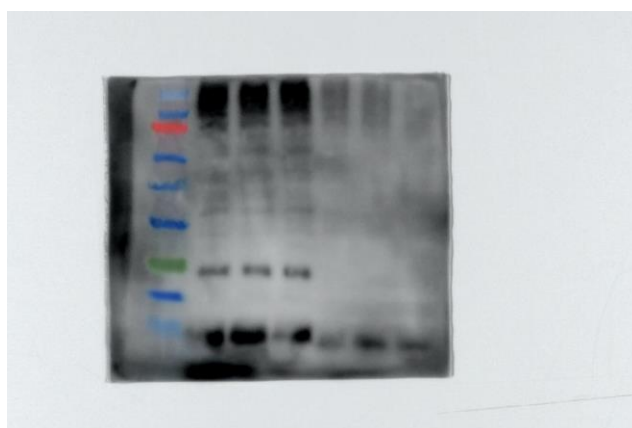

GAPDH

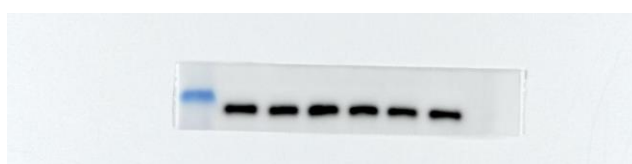

**Fig. 4A**

ISG15

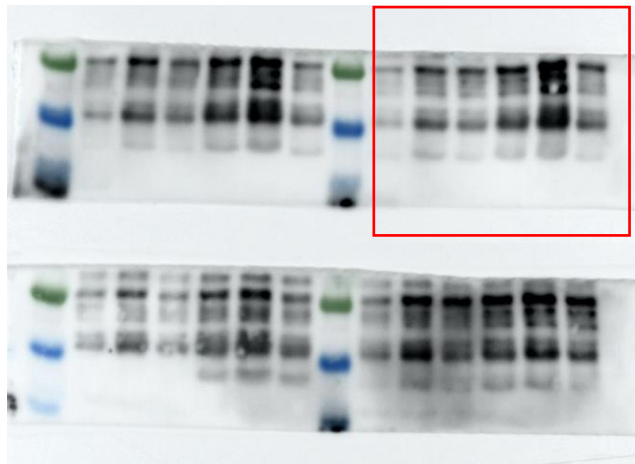

STING

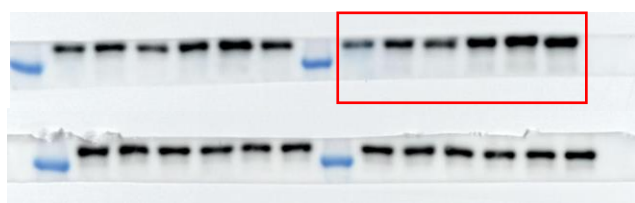

ISG-STING

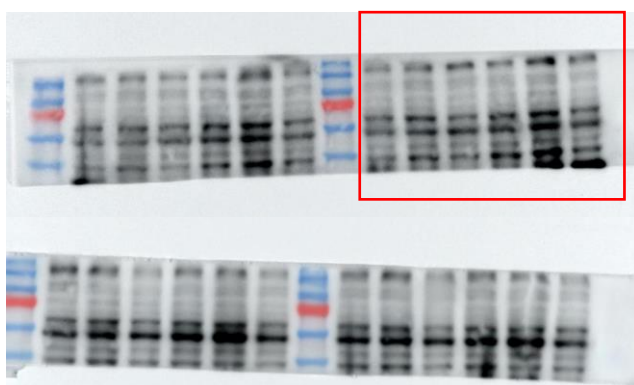

C-FOS

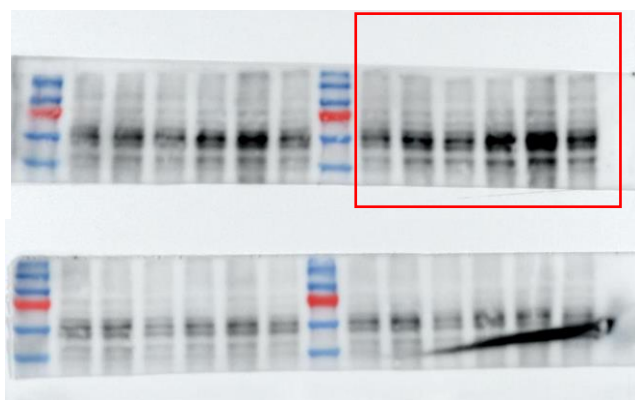

NF-KB

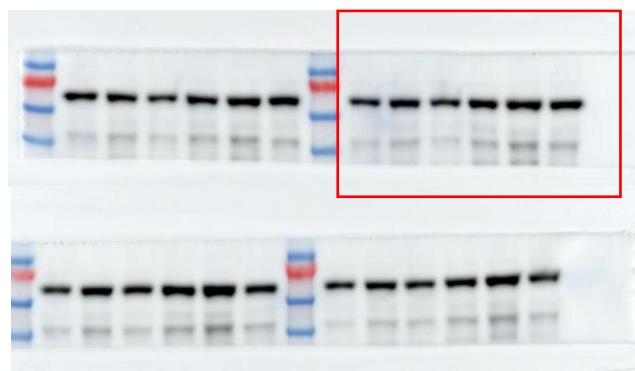

Fig. 4A

TNF- $\alpha$

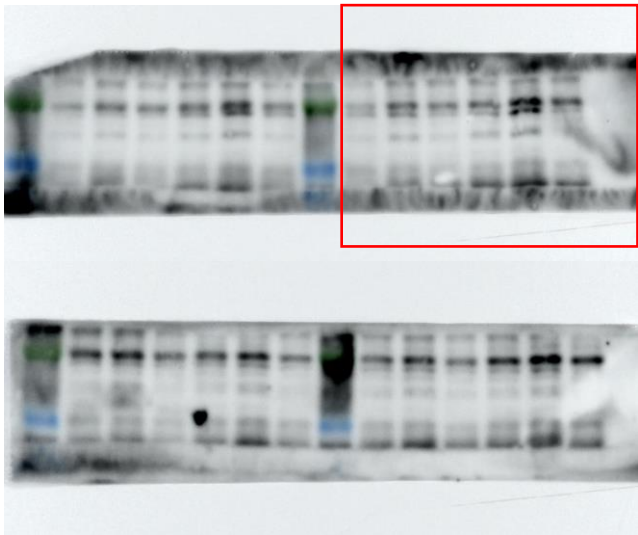

TH

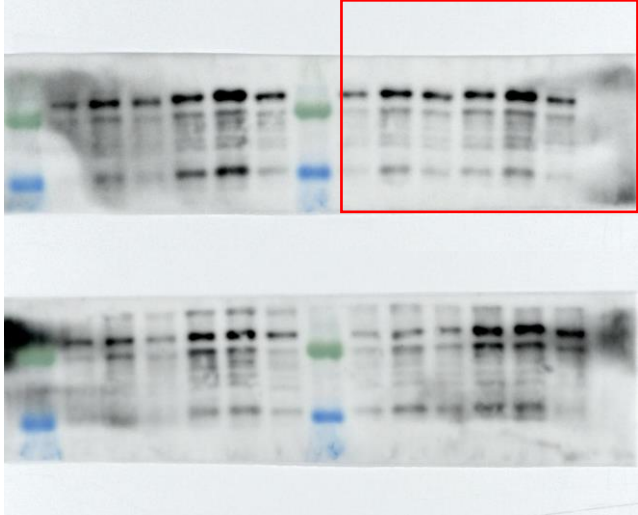

$\alpha$ -tubulin

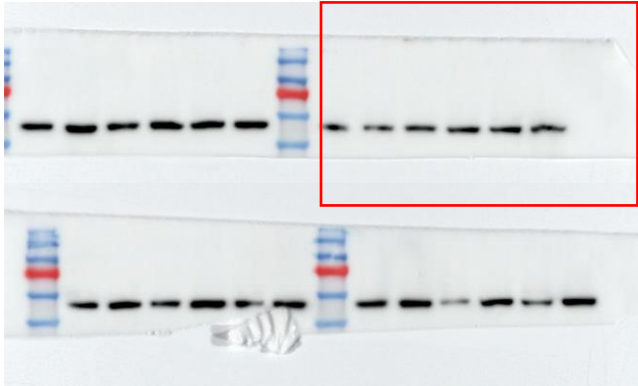

**Fig. 4C**

ISG15

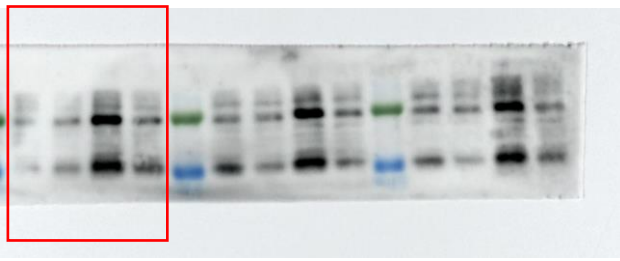

STING

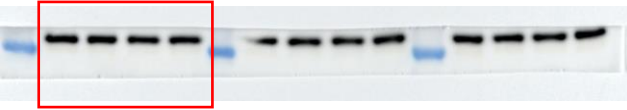

ISG-STING

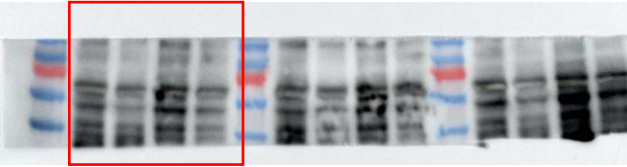

C-FOS

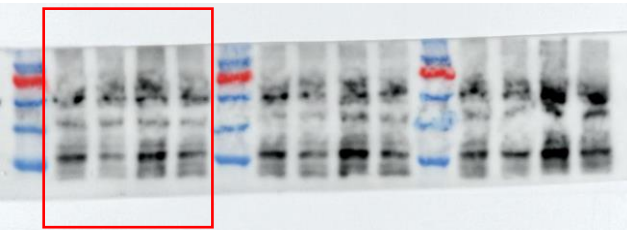

NF- $\kappa$ B

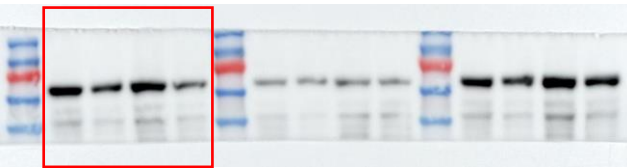

TNF- $\alpha$

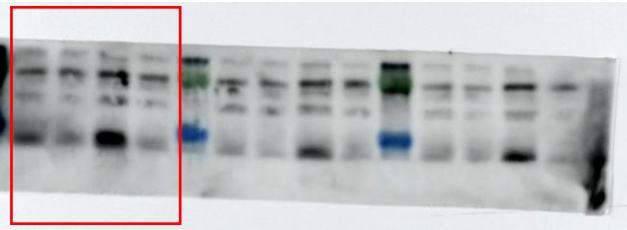

$\alpha$ -syn

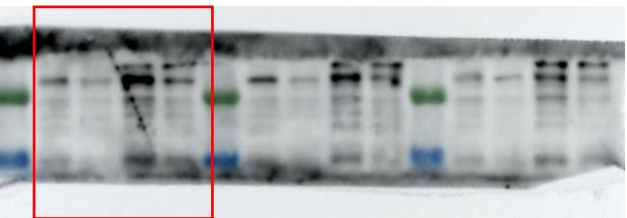

$\alpha$ -tublin

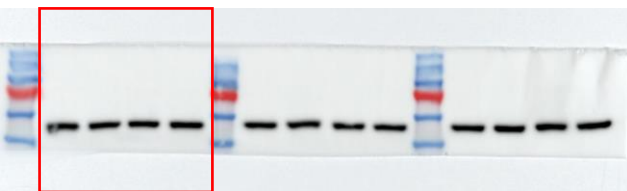

**Fig. 4E**

ISG15

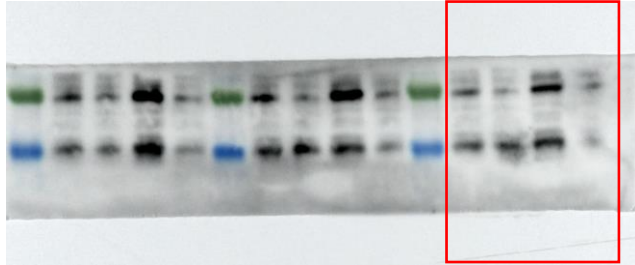

STING

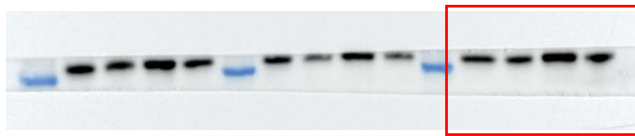

ISG-STING

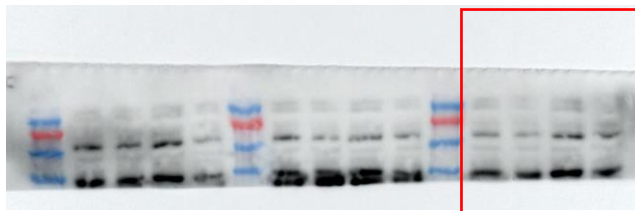

C-FOS

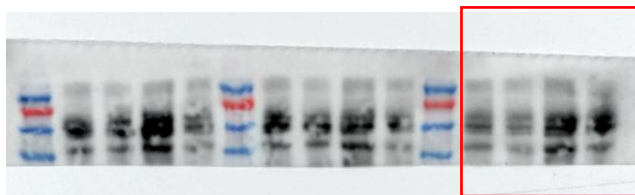

NF-KB

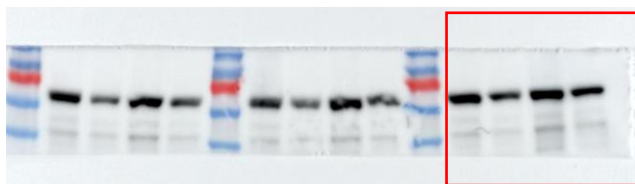

TNF- $\alpha$

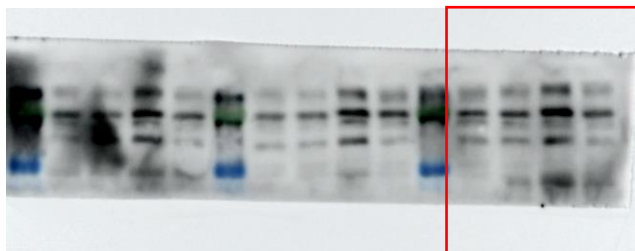

$\alpha$ -syn

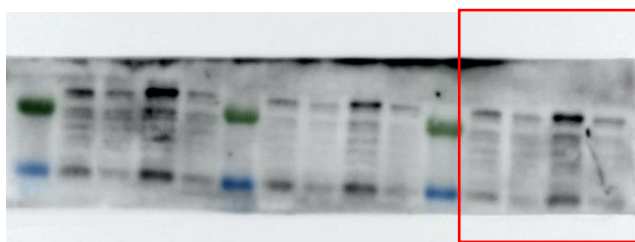

$\alpha$ -tublin

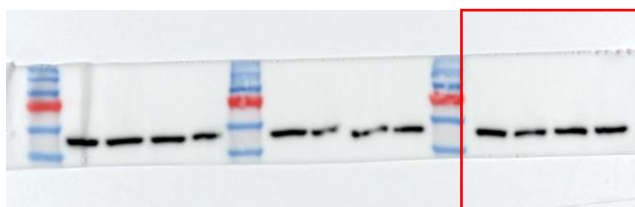

**Fig. 5G**

ISG15

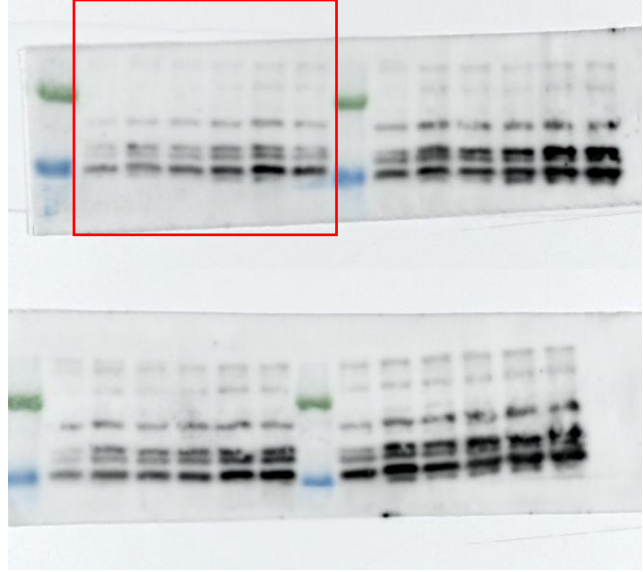

STING

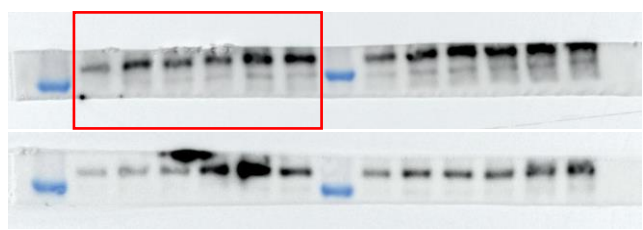

ISG-STING

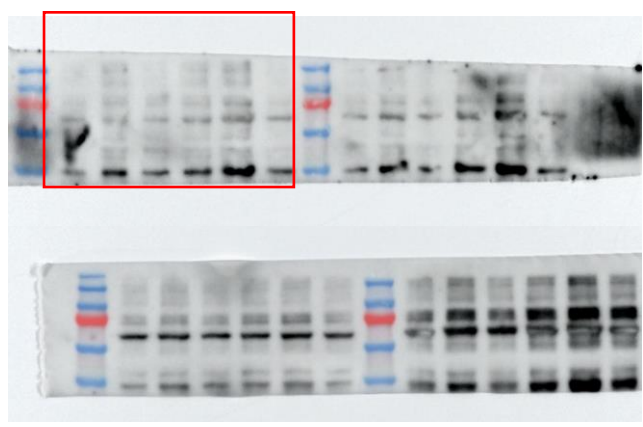

C-FOS

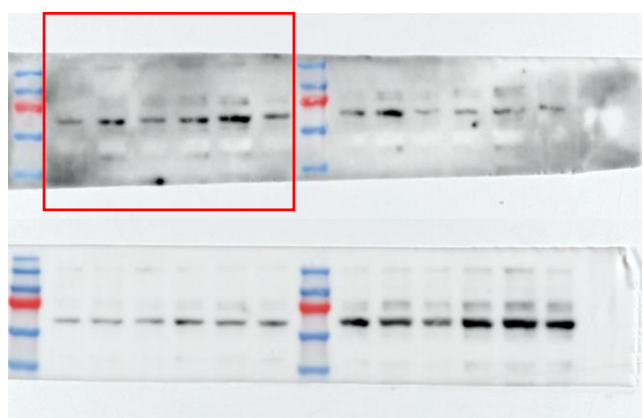

NF-KB

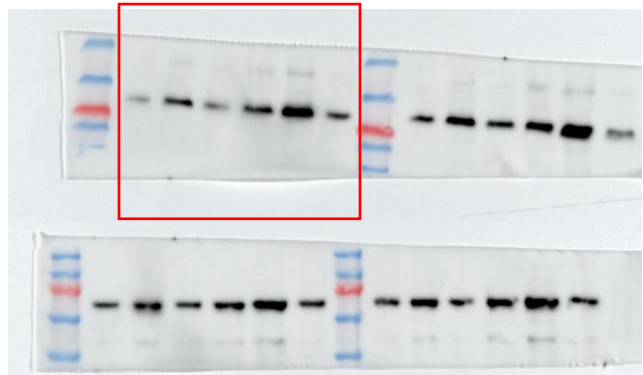

**Fig. 5G**

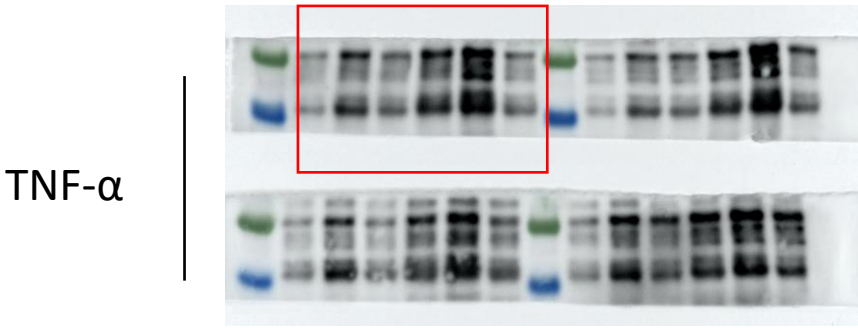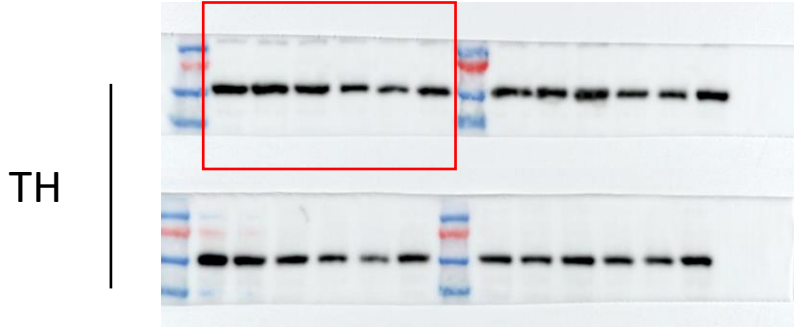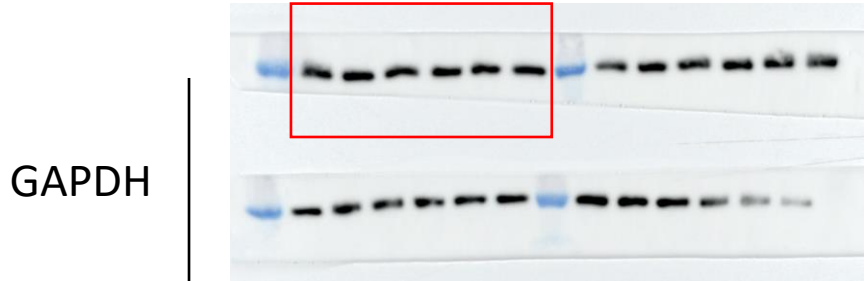

**Fig. 7G**

ISG15

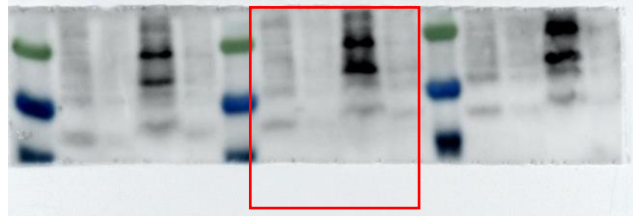

STING

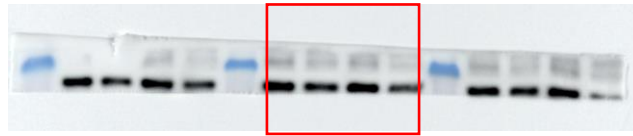

ISG-STING

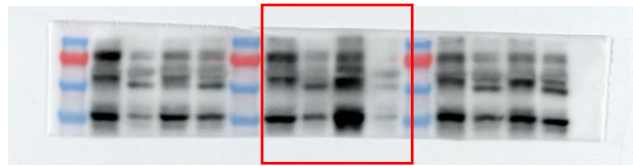

C-FOS

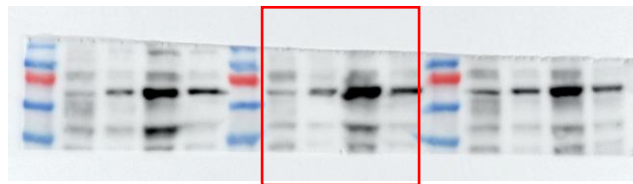

NF-KB

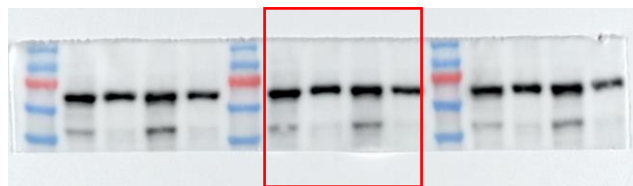

TNF- $\alpha$

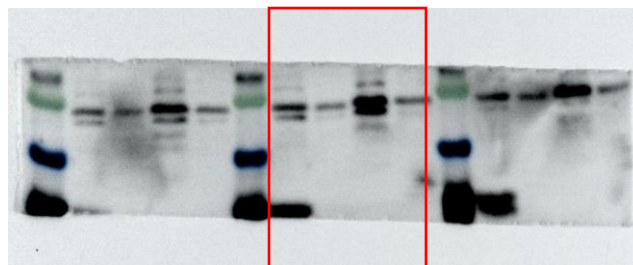

TH

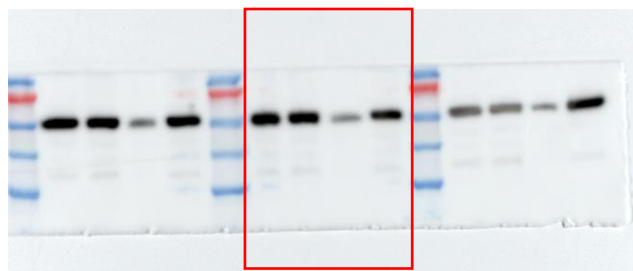

GAPDH

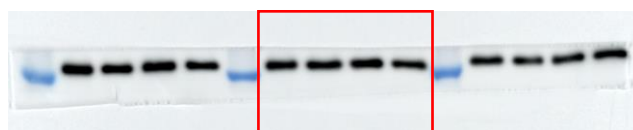

**Fig. 8G**

ISG15

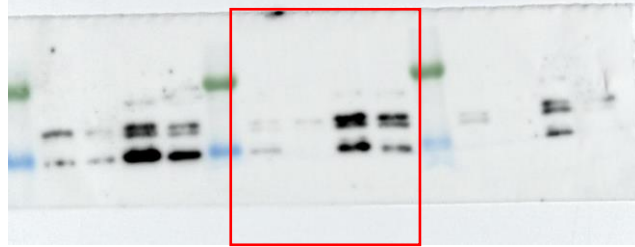

STING

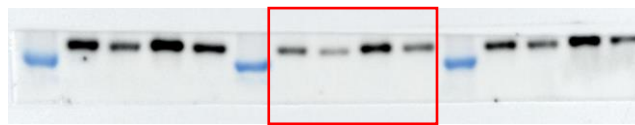

ISG-STING

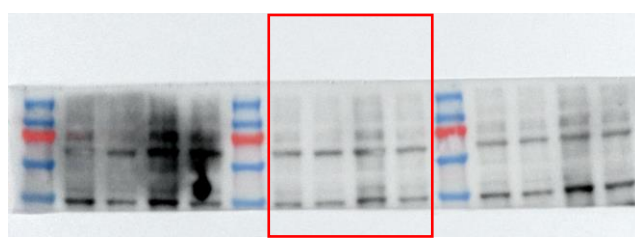

C-FOS

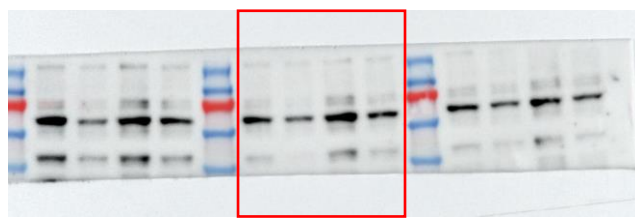

NF-KB

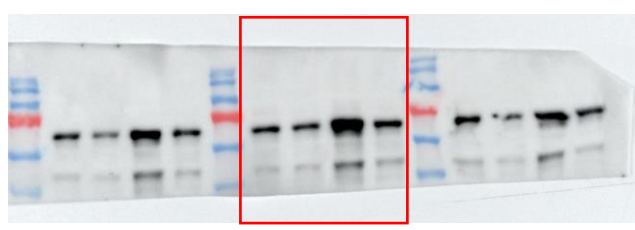

TNF- $\alpha$

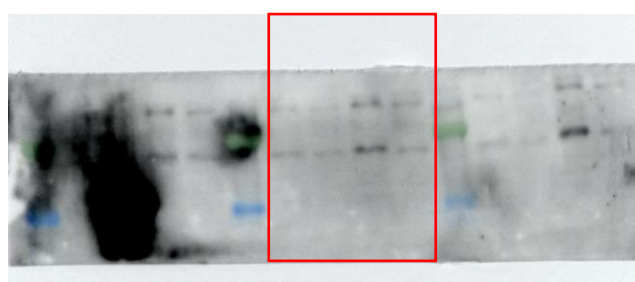

TH

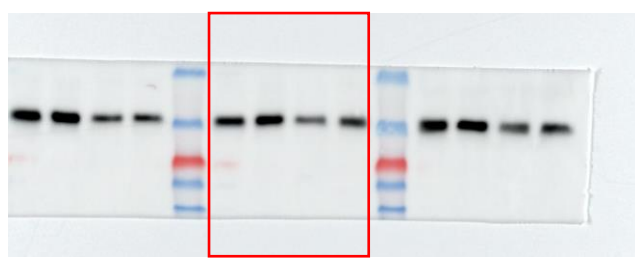

$\alpha$ -tublin

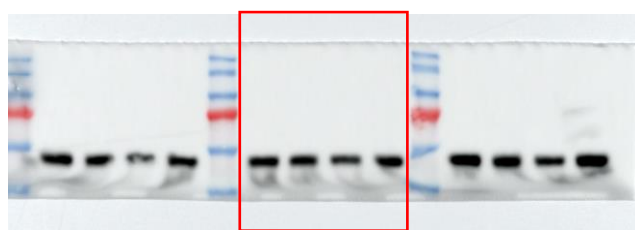

**Fig. 9G**

ISG15

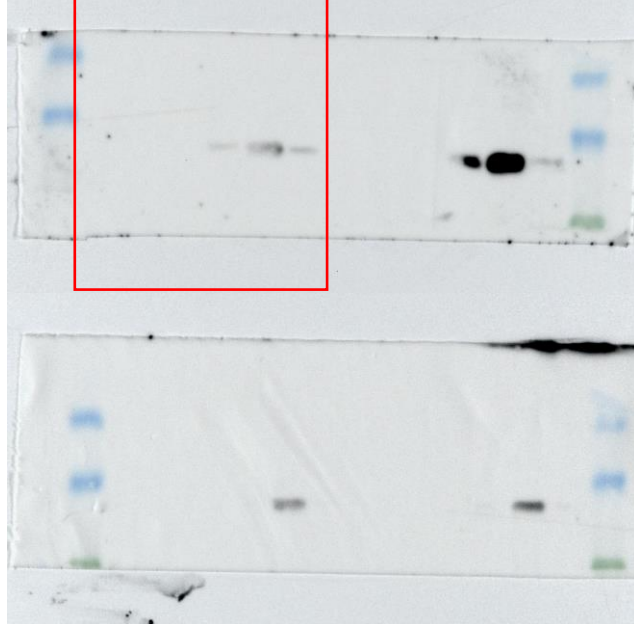

STING

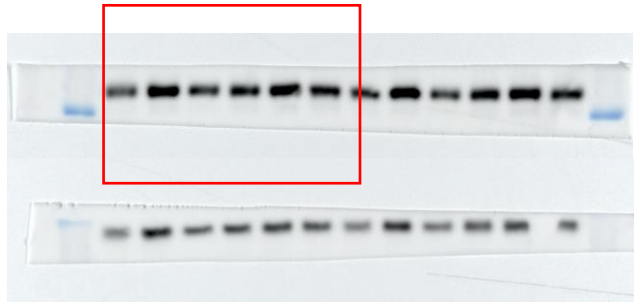

ISG-STING

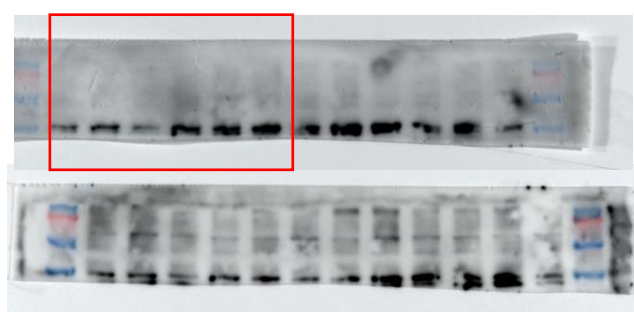

C-FOS

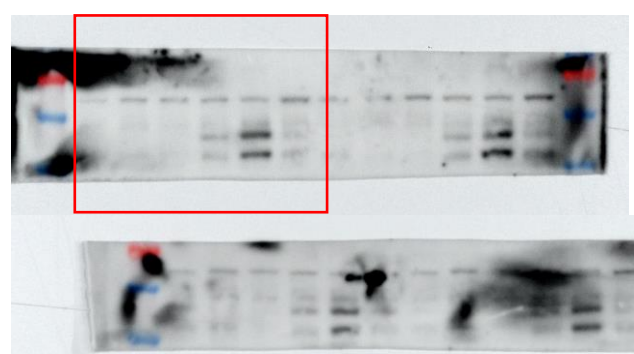

NF-KB

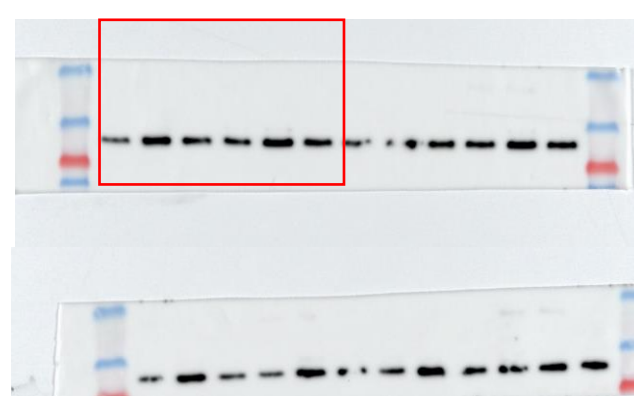

Fig. 9G

TNF- $\alpha$

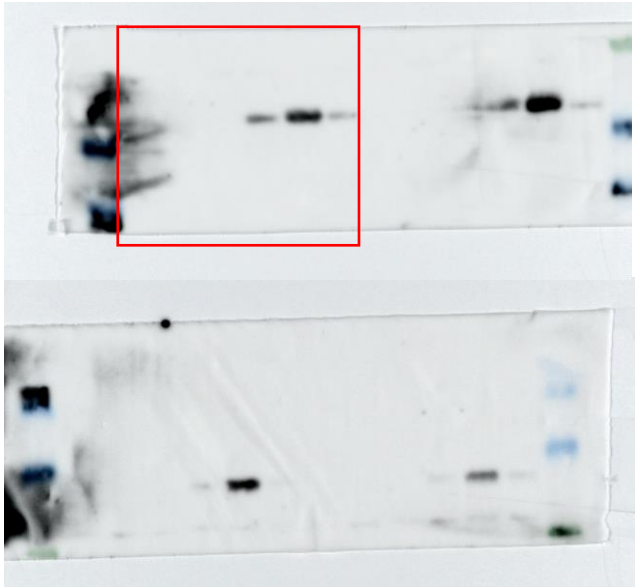

$\alpha$ -syn

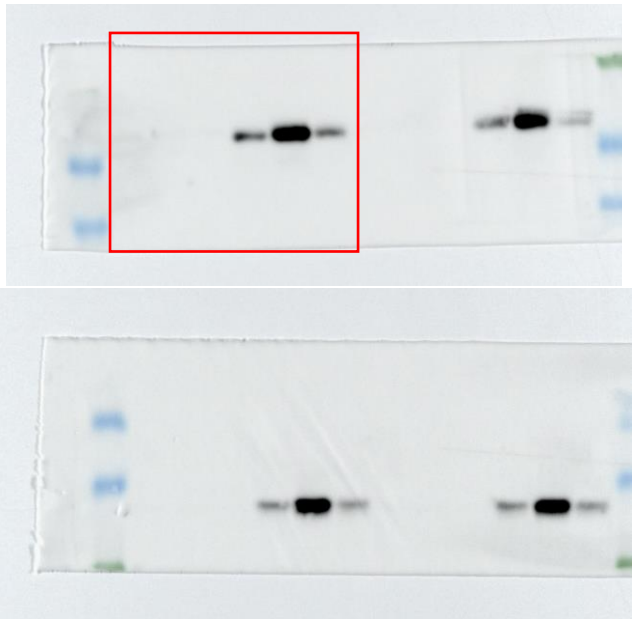

GAPDH

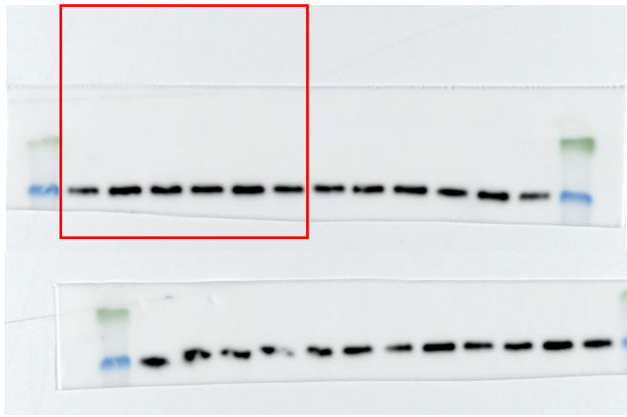

**Fig. S1**

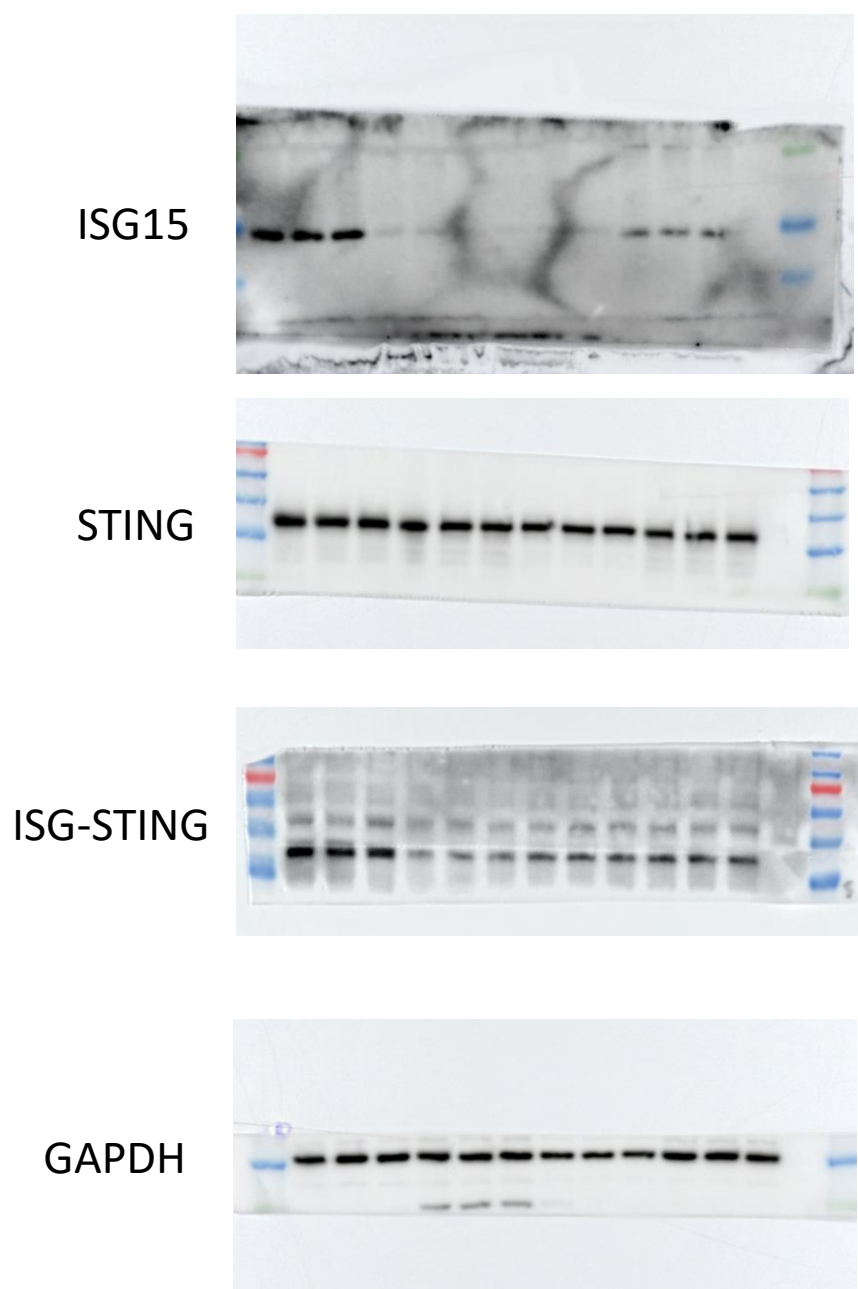

**Fig. S2**

STING

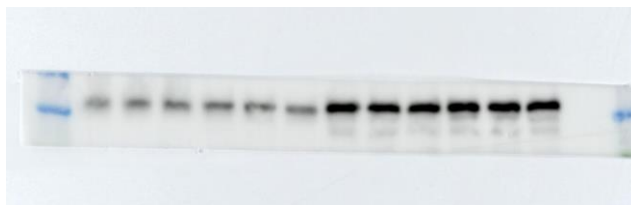

ISG-STING

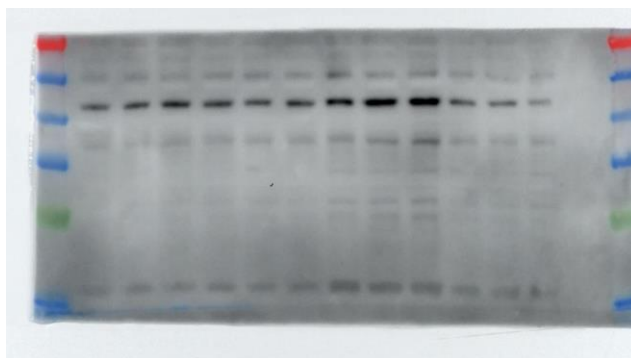

ubiquitin

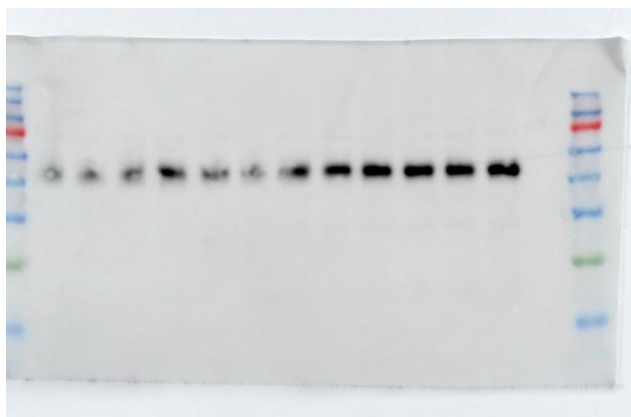

GAPDH

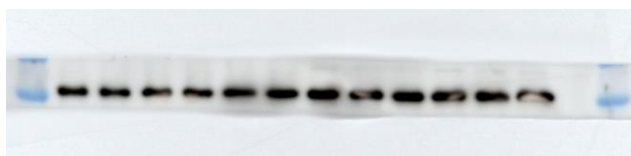

**Fig.S3**

STING

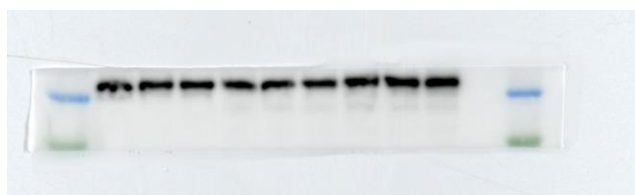

ISG-STING

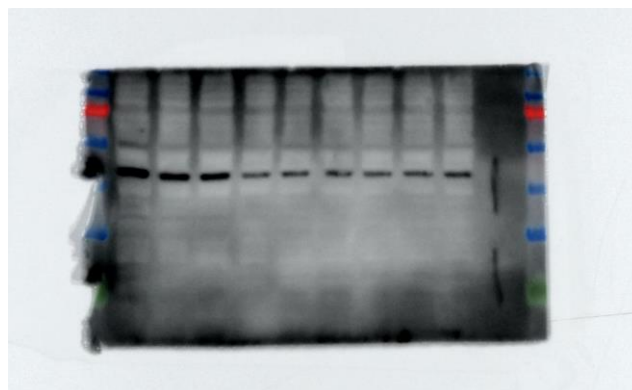

ubiquitin

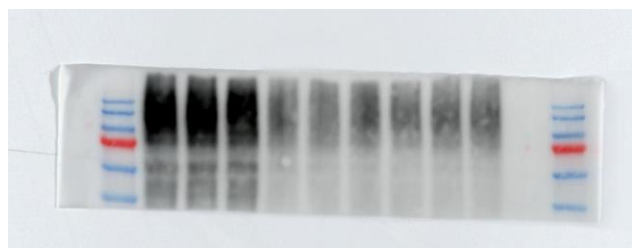

GAPDH

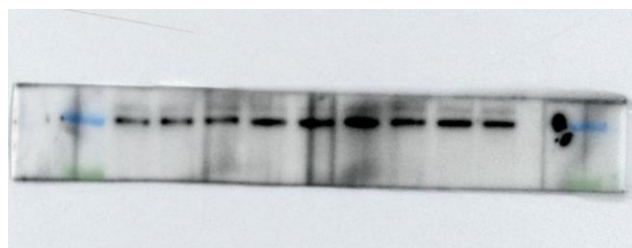

Supplement: Supplementary file 1 [file 30a30d3f83368cc1c8e3c4f4.pdf]
